# Supplementary material for: Quantitative Trait Loci Mapping and Marker Identification for Low Salinity Tolerance Trait in the Swimming Crab (Portunus trituberculatus)
Source: Front Genet. 2019 Nov 20;10:1193. doi: 10.3389/fgene.2019.01193 (PMC6900548; doi:10.3389/fgene.2019.01193)
Supplement: Supplementary file 1 [file Table_1.xlsx]

## Sheet: 1
Table S1 Phenotypic traits of individuals each
Sample ID	Survival time (h)
1	NA
2	NA
3	44.75
4	40.5833
5	Survive in 72 hours
6	36.0333
7	48.5833
8	37.75
9	Survive in 72 hours
10	Survive in 72 hours
11	Survive in 72 hours
12	Survive in 72 hours
13	NA
14	46.25
15	NA
16	37.75
17	NA
18	45
19	NA
20	42.5833
21	65.1167
22	58.75
23	65.6333
24	0.916667
25	48.5833
26	NA
27	NA
28	NA
29	32.75
30	48.5833
31	Survive in 72 hours
32	69.75
33	39.4167
34	Survive in 72 hours
35	42.5833
36	68.3
37	32.75
38	60.75
39	NA
40	37.75
41	54.25
42	14.75
43	NA
44	NA
45	54.75
46	65.35
47	51.75
48	71.75
49	Survive in 72 hours
50	NA
51	51.75
52	54.25
53	Survive in 72 hours
54	54.25
55	12.5833
56	45
57	48.5833
58	60.75
59	37.75
60	Survive in 72 hours
61	42.5833
62	32.75
63	14.75
64	58.75
65	63.0833
66	63.0833
67	63.0833
68	54.75
69	NA
70	48.5833
71	45
72	NA
73	NA
74	17
75	65.1167
76	57.0833
77	39.4167
78	46.25
79	36.0333
80	71.75
81	51.75
82	46.25
83	55.1667
84	46.25
85	23.2
86	NA
87	54.25
88	57.0833
89	51.75
90	65.1167
91	69.75
92	42.5833
93	51.75
94	63.0833
95	Survive in 72 hours
96	57.0667
97	42.9667
98	39.4167
99	36.0333
100	NA
101	51.75
102	58.75
103	58.75
104	54.25
105	51.75
106	36.0333
107	NA
108	NA
109	NA
110	NA
111	NA
112	NA
113	NA
114	NA
115	NA
116	NA
