# Supplementary material for: Quantitative Trait Loci Mapping and Marker Identification for Low Salinity Tolerance Trait in the Swimming Crab (Portunus trituberculatus)
Source: Front Genet. 2019 Nov 20;10:1193. doi: 10.3389/fgene.2019.01193 (PMC6900548; doi:10.3389/fgene.2019.01193)
Supplement: Supplementary file 6 [file Table_6.xlsx]

## Sheet: 1
Table S6 Salinity markers located in the sequence of the annotated scaffolds/contigs
Marker ID	Scaffolds/contigs ID	Annotation
Marker10037/Marker614	scaffold543	ID=LOCUS_009697-RA;Parent=LOCUS_009697;db_xref=GO:0004970|GO:0016020,InterPro:IPR001320,PFAM:PF00060;product=Glutamate receptor ionotropic, delta-2
Marker10037/Marker614	scaffold543	ID=LOCUS_009692-RA;Parent=LOCUS_009692;db_xref=GO:0003824,GO:0004553|GO:0005975,GO:0004553|GO:0005975|GO:0030246,GO:0004553|GO:0030247,GO:0030246,InterPro:IPR000859,InterPro:IPR001701,InterPro:IPR001919,InterPro:IPR008928,InterPro:IPR008965,InterPro:IPR012291,InterPro:IPR012341,InterPro:IPR033126,PFAM:PF00553,PFAM:PF00759;product=Endoglucanase A
Marker10037/Marker614	scaffold543	ID=LOCUS_009701-RA;Parent=LOCUS_009701;db_xref=CDD:cd00037,CDD:cd00112,GO:0005230|GO:0006810|GO:0016020,GO:0005515,GO:0006811|GO:0016020,GO:0006811|GO:0016021,InterPro:IPR002172,InterPro:IPR006028,InterPro:IPR006029,InterPro:IPR006202,InterPro:IPR013320,InterPro:IPR016186,InterPro:IPR016187,InterPro:IPR018000,InterPro:IPR023415,PFAM:PF00057,PFAM:PF02931,PFAM:PF13385;product=Glycine receptor subun…
Marker10037/Marker614	scaffold543	ID=LOCUS_009702-RA;Parent=LOCUS_009702;db_xref=GO:0004970|GO:0005234|GO:0016020,GO:0004970|GO:0016020,InterPro:IPR001320,InterPro:IPR019594,PFAM:PF00060,PFAM:PF10613;product=Glutamate receptor 2
Marker10037/Marker614	scaffold543	ID=LOCUS_009694-RA;Parent=LOCUS_009694;db_xref=GO:0003824,GO:0004553|GO:0005975,GO:0004553|GO:0005975|GO:0030246,GO:0004553|GO:0030247,GO:0030246,InterPro:IPR001701,InterPro:IPR001919,InterPro:IPR008928,InterPro:IPR008965,InterPro:IPR012291,InterPro:IPR012341,InterPro:IPR031986,InterPro:IPR033126,PFAM:PF00553,PFAM:PF00759,PFAM:PF16030;product=Endoglucanase A
Marker110409	scaffold1790	ID=LOCUS_020875-RA;Parent=LOCUS_020875;db_xref=GO:0003824|GO:0008152,GO:0004421|GO:0008299,InterPro:IPR010122,InterPro:IPR013746,InterPro:IPR016039,PFAM:PF08540,TIGRFAM:TIGR01833;product=Hydroxymethylglutaryl-CoA synthase 1
Marker110409	scaffold1790	ID=LOCUS_020876-RA;Parent=LOCUS_020876;db_xref=CDD:cd03427,GO:0003824|GO:0008152,GO:0004421|GO:0008299,GO:0006281|GO:0008413,GO:0016787,InterPro:IPR000086,InterPro:IPR003563,InterPro:IPR013528,InterPro:IPR015797,InterPro:IPR016039,PFAM:PF01154;product=7,8-dihydro-8-oxoguanine triphosphatase
Marker114187	scaffold65	ID=LOCUS_001948-RA;Parent=LOCUS_001948;db_xref=GO:0005515,InterPro:IPR000210,InterPro:IPR006652,InterPro:IPR011043,InterPro:IPR011333,InterPro:IPR011705,InterPro:IPR015916,InterPro:IPR017096,PFAM:PF00651,PFAM:PF01344,PFAM:PF07707;product=Kelch-like protein 12
Marker114187	scaffold65	ID=LOCUS_001945-RA;Parent=LOCUS_001945;db_xref=GO:0005515,InterPro:IPR001298,InterPro:IPR013783,InterPro:IPR014756,InterPro:IPR017868,PFAM:PF00630;product=Filamin-B
Marker114187	scaffold65	ID=LOCUS_001957-RA;Parent=LOCUS_001957;db_xref=CDD:cd00051,GO:0005509,GO:0005515,InterPro:IPR002048,InterPro:IPR002172,InterPro:IPR009011,InterPro:IPR011992,InterPro:IPR018247,InterPro:IPR028146,PFAM:PF12999,PFAM:PF13015,PFAM:PF13202;product=Glucosidase 2 subunit beta
Marker114187	scaffold65	ID=LOCUS_001942-RA;Parent=LOCUS_001942;db_xref=GO:0005515,InterPro:IPR001298,InterPro:IPR013783,InterPro:IPR014756,InterPro:IPR017868,PFAM:PF00630;product=Filamin-A
Marker114187	scaffold65	ID=LOCUS_001950-RA;Parent=LOCUS_001950;db_xref=CDD:cd08056,CDD:cd13838,GO:0003676,GO:0003723,GO:0005515,GO:0017070,GO:0030623,InterPro:IPR000555,InterPro:IPR012337,InterPro:IPR012984,InterPro:IPR019580,InterPro:IPR019581,InterPro:IPR019582,InterPro:IPR021983,PFAM:PF01398,PFAM:PF08084,PFAM:PF10596,PFAM:PF10597,PFAM:PF10598,PFAM:PF12134;product=Pre-mRNA-processing-splicing factor 8
Marker127571	scaffold5721	ID=LOCUS_036832-RA;Parent=LOCUS_036832;db_xref=CDD:cd02186,GO:0003924,GO:0005200|GO:0005525|GO:0005874|GO:0007017,GO:0005525|GO:0005874|GO:0007017,GO:0005874|GO:0007017,InterPro:IPR000217,InterPro:IPR002452,InterPro:IPR003008,InterPro:IPR008280,InterPro:IPR017975,InterPro:IPR018316,InterPro:IPR023123,PFAM:PF00091,PFAM:PF03953;product=Tubulin alpha chain
Marker145507	scaffold12	ID=LOCUS_000503-RA;Parent=LOCUS_000503;db_xref=CDD:cd06203,GO:0016491|GO:0055114,InterPro:IPR001433,InterPro:IPR001709,InterPro:IPR003097,InterPro:IPR017927,InterPro:IPR017938,InterPro:IPR023173,PFAM:PF00175,PFAM:PF00667;product=Methionine synthase reductase
Marker145507	scaffold12	ID=LOCUS_000515-RA;Parent=LOCUS_000515;db_xref=GO:0005092|GO:0007264,GO:0005968|GO:0006886|GO:0018344,GO:0016491|GO:0055114,InterPro:IPR001738,InterPro:IPR018203,InterPro:IPR023753,PFAM:PF00996;product=Rab proteins geranylgeranyltransferase component A 1
Marker145507	scaffold12	ID=LOCUS_000507-RA;Parent=LOCUS_000507;db_xref=GO:0006810|GO:0016021,InterPro:IPR009038,PFAM:PF01105;product=Transmembrane emp24 domain-containing protein bai
Marker145507	scaffold12	ID=LOCUS_000513-RA;Parent=LOCUS_000513;db_xref=GO:0005968|GO:0006886|GO:0018344,InterPro:IPR001738;product=Rab proteins geranylgeranyltransferase component A
Marker145507	scaffold12	ID=LOCUS_000501-RA;Parent=LOCUS_000501;db_xref=CDD:cd01303,GO:0003677,GO:0006147|GO:0008270|GO:0008892,GO:0016787,InterPro:IPR006680,InterPro:IPR009057,InterPro:IPR011991,InterPro:IPR014311,InterPro:IPR032466,PFAM:PF01979,TIGRFAM:TIGR02967;product=Guanine deaminase
Marker145507	scaffold12	ID=LOCUS_000489-RA;Parent=LOCUS_000489;db_xref=CDD:cd05188,GO:0055114,InterPro:IPR011032,InterPro:IPR013149,InterPro:IPR016040,PFAM:PF00107;product=L-threonine 3-dehydrogenase
Marker145507	scaffold12	ID=LOCUS_000490-RA;Parent=LOCUS_000490;db_xref=GO:0055114,InterPro:IPR013149,InterPro:IPR016040,PFAM:PF00107;product=L-threonine 3-dehydrogenase
Marker145507	scaffold12	ID=LOCUS_000498-RA;Parent=LOCUS_000498;db_xref=InterPro:IPR019265,PFAM:PF10036;product=UPF0568 protein C14orf166
Marker145507	scaffold12	ID=LOCUS_000504-RA;Parent=LOCUS_000504;product=Treslin
Marker145507	scaffold12	ID=LOCUS_000516-RA;Parent=LOCUS_000516;db_xref=GO:0000902,GO:0003779|GO:0007010,GO:0005096,InterPro:IPR006599,InterPro:IPR012945,InterPro:IPR013912,InterPro:IPR016098,InterPro:IPR017332,InterPro:IPR017901,PFAM:PF07986;product=Protein XRP2
Marker145507	scaffold12	ID=LOCUS_000505-RA;Parent=LOCUS_000505;product=Eukaryotic translation initiation factor 3 subunit A
Marker145507	scaffold12	ID=LOCUS_000494-RA;Parent=LOCUS_000494;db_xref=PFAM:PF11715;product=Nuclear pore complex protein Nup160
Marker145507	scaffold12	ID=LOCUS_000491-RA;Parent=LOCUS_000491;db_xref=InterPro:IPR009686,PFAM:PF06911;product=Protein spartin
Marker145507	scaffold12	ID=LOCUS_000492-RA;Parent=LOCUS_000492;db_xref=GO:0005509,InterPro:IPR002048,InterPro:IPR011992,InterPro:IPR018247,PFAM:PF13499;product=Nucleobindin-2
Marker172259	scaffold486	ID=LOCUS_009029-RA;Parent=LOCUS_009029;db_xref=InterPro:IPR024509,InterPro:IPR024716,PFAM:PF11630;product=Anti-lipopolysaccharide factor
Marker172259	scaffold486	ID=LOCUS_009025-RA;Parent=LOCUS_009025;db_xref=GO:0005245|GO:0005891|GO:0070588,InterPro:IPR000584,InterPro:IPR008145,InterPro:IPR027417,PFAM:PF00625;product=Voltage-dependent L-type calcium channel subunit beta-2
Marker172259	scaffold486	ID=LOCUS_009020-RA;Parent=LOCUS_009020;db_xref=GO:0005245|GO:0005891|GO:0070588,InterPro:IPR000584,PFAM:PF12052;product=Voltage-dependent L-type calcium channel subunit beta-1
Marker172259	scaffold486	ID=LOCUS_009028-RA;Parent=LOCUS_009028;db_xref=InterPro:IPR024509,InterPro:IPR024716,PFAM:PF11630;product=Anti-lipopolysaccharide factor
Marker17231	scaffold3240	ID=LOCUS_028714-RA;Parent=LOCUS_028714;db_xref=CDD:cd00992,GO:0005515,InterPro:IPR001478,InterPro:IPR006020,InterPro:IPR011993,PFAM:PF00595,PFAM:PF00640;product=Protein lin-10
Marker17335	scaffold2231	ID=LOCUS_023584-RA;Parent=LOCUS_023584;product=Mediator of RNA polymerase II transcription subunit 27
Marker19396	scaffold84	ID=LOCUS_002387-RA;Parent=LOCUS_002387;db_xref=GO:0005515,InterPro:IPR001611,InterPro:IPR003591,InterPro:IPR025875,InterPro:IPR032675,PFAM:PF12799,PFAM:PF14580;product=Leucine-rich repeat-containing protein 49
Marker19396	scaffold84	ID=LOCUS_002382-RA;Parent=LOCUS_002382;db_xref=CDD:cd02859,GO:0005515,InterPro:IPR006828,InterPro:IPR014756,InterPro:IPR032640,PFAM:PF04739,PFAM:PF16561;product=5'-AMP-activated protein kinase subunit beta-1
Marker19396	scaffold84	ID=LOCUS_002393-RA;Parent=LOCUS_002393;db_xref=CDD:cd15867,GO:0006810,GO:0016021|GO:0016192,InterPro:IPR001388,InterPro:IPR010908,InterPro:IPR011012,PFAM:PF00957,PFAM:PF13774;product=Synaptobrevin YKT6
Marker28591	scaffold2963	ID=LOCUS_027381-RA;Parent=LOCUS_027381;db_xref=CDD:cd01335,CDD:cd01420,GO:0003824,GO:0003824|GO:0046872|GO:0051539,GO:0003824|GO:0051536,GO:0006777,GO:0006777|GO:0019008|GO:0051539,GO:0006777|GO:0046872,InterPro:IPR000385,InterPro:IPR002820,InterPro:IPR006638,InterPro:IPR007197,InterPro:IPR010505,InterPro:IPR013483,InterPro:IPR013785,InterPro:IPR023045,InterPro:IPR023046,PFAM:PF01967,PFAM:PF04055…
Marker31088	scaffold1183	ID=LOCUS_016290-RA;Parent=LOCUS_016290;db_xref=CDD:cd00051,GO:0005509,InterPro:IPR001751,InterPro:IPR002048,InterPro:IPR011992,InterPro:IPR018247,PFAM:PF13499;product=Ninein-like protein
Marker31088	scaffold1183	ID=LOCUS_016288-RA;Parent=LOCUS_016288;db_xref=GO:0005515,InterPro:IPR001214,PFAM:PF00856;product=Protein msta, isoform A
Marker31088	scaffold1183	ID=LOCUS_016292-RA;Parent=LOCUS_016292;db_xref=InterPro:IPR003397,PFAM:PF02466;product=RPII140-upstream gene protein
Marker31088	scaffold1183	ID=LOCUS_016294-RA;Parent=LOCUS_016294;product=Blastoderm-specific protein 25D
Marker31088	scaffold1183	ID=LOCUS_016293-RA;Parent=LOCUS_016293;product=Ninein
Marker31088	scaffold1183	ID=LOCUS_016296-RA;Parent=LOCUS_016296;db_xref=GO:0008152|GO:0016491|GO:0016620|GO:0055114,GO:0008152|GO:0016491|GO:0055114,InterPro:IPR015590,InterPro:IPR016160,InterPro:IPR016161,InterPro:IPR016162,InterPro:IPR016163,InterPro:IPR029510,PFAM:PF00171;product=Aldehyde dehydrogenase, mitochondrial
Marker31823	scaffold223	ID=LOCUS_005277-RA;Parent=LOCUS_005277;product=Dolichyl-diphosphooligosaccharide--protein glycosyltransferase subunit STT3B
Marker31823	scaffold223	ID=LOCUS_005271-RA;Parent=LOCUS_005271;db_xref=InterPro:IPR014729;product=Diphthine--ammonia ligase
Marker31823	scaffold223	ID=LOCUS_005266-RA;Parent=LOCUS_005266;db_xref=GO:0046854,InterPro:IPR000760,InterPro:IPR020583,PFAM:PF00459;product=Inositol polyphosphate 1-phosphatase
Marker31823	scaffold223	ID=LOCUS_005268-RA;Parent=LOCUS_005268;db_xref=GO:0016020,InterPro:IPR002809,InterPro:IPR008568,PFAM:PF01956;product=ER membrane protein complex subunit 3
Marker31823	scaffold223	ID=LOCUS_005275-RA;Parent=LOCUS_005275;db_xref=GO:0004576|GO:0006486|GO:0016020,InterPro:IPR003674,PFAM:PF02516;product=Dolichyl-diphosphooligosaccharide--protein glycosyltransferase subunit stt-3
Marker31823	scaffold223	ID=LOCUS_005267-RA;Parent=LOCUS_005267;db_xref=GO:0005743|GO:0008137|GO:0042773,InterPro:IPR009947,PFAM:PF07347;product=NADH dehydrogenase [ubiquinone] 1 alpha subcomplex subunit 7
Marker31823	scaffold223	ID=LOCUS_005282-RA;Parent=LOCUS_005282;db_xref=CDD:cd00043,GO:0005515,InterPro:IPR001810,InterPro:IPR006671,InterPro:IPR013763,PFAM:PF00134,PFAM:PF12937;product=Cyclin-F
Marker31823	scaffold223	ID=LOCUS_005273-RA;Parent=LOCUS_005273;db_xref=InterPro:IPR019133,PFAM:PF09731;product=MICOS complex subunit Mic60
Marker3645	scaffold648	ID=LOCUS_010986-RA;Parent=LOCUS_010986;db_xref=GO:0003677,GO:0004970|GO:0005234|GO:0016020,GO:0004970|GO:0016020,InterPro:IPR001320,InterPro:IPR009057,InterPro:IPR019594,PFAM:PF00060,PFAM:PF10613,PFAM:PF13384;product=Glutamate receptor
Marker3645	scaffold648	ID=LOCUS_010992-RA;Parent=LOCUS_010992;db_xref=CDD:cd00204,GO:0005515,InterPro:IPR002110,InterPro:IPR020683,PFAM:PF13857;product=Ankyrin repeat and LEM domain-containing protein 2
Marker3645	scaffold648	ID=LOCUS_010988-RA;Parent=LOCUS_010988;db_xref=GO:0003677,GO:0004970|GO:0016020,InterPro:IPR001320,InterPro:IPR009057,PFAM:PF00060,PFAM:PF13384;product=Glutamate receptor
Marker3645	scaffold648	ID=LOCUS_010990-RA;Parent=LOCUS_010990;db_xref=GO:0004298,GO:0004298|GO:0005839|GO:0051603,GO:0004970|GO:0016020,InterPro:IPR001320,InterPro:IPR001353,InterPro:IPR023332,InterPro:IPR029055,PFAM:PF00060,PFAM:PF00227;product=Proteasome subunit alpha type-2
Marker42696	scaffold275	ID=LOCUS_006091-RA;Parent=LOCUS_006091;db_xref=GO:0005795|GO:0008455|GO:0009312|GO:0016021,InterPro:IPR007754,InterPro:IPR029044,PFAM:PF05060;product=Alpha-1,6-mannosyl-glycoprotein 2-beta-N-acetylglucosaminyltransferase
Marker42696	scaffold275	ID=LOCUS_006096-RA;Parent=LOCUS_006096;db_xref=InterPro:IPR018108,InterPro:IPR023395,PFAM:PF00153;product=Solute carrier family 25 member 46
Marker42696	scaffold275	ID=LOCUS_006089-RA;Parent=LOCUS_006089;db_xref=CDD:cd00087,InterPro:IPR002181,InterPro:IPR014715,InterPro:IPR014716,PFAM:PF00147;product=Angiopoietin-4
Marker43889/Marker63831	scaffold2008	ID=LOCUS_022277-RA;Parent=LOCUS_022277;db_xref=GO:0003677,GO:0004970|GO:0005234|GO:0016020,GO:0004970|GO:0016020,InterPro:IPR001320,InterPro:IPR009057,InterPro:IPR019594,PFAM:PF00060,PFAM:PF10613,PFAM:PF13384;product=Glutamate receptor 2
Marker43889/Marker63831	scaffold2008	ID=LOCUS_022278-RA;Parent=LOCUS_022278;db_xref=CDD:cd06174,GO:0016021|GO:0055085,InterPro:IPR011701,InterPro:IPR020846,PFAM:PF07690;product=Monocarboxylate transporter 14
Marker51285	scaffold864	ID=LOCUS_013307-RA;Parent=LOCUS_013307;db_xref=CDD:cd00063,CDD:cd00096,GO:0005515,InterPro:IPR003598,InterPro:IPR003599,InterPro:IPR003961,InterPro:IPR007110,InterPro:IPR013098,InterPro:IPR013783,PFAM:PF00041,PFAM:PF07679,PFAM:PF13927;product=Down syndrome cell adhesion molecule-like protein Dscam2
Marker51285	scaffold864	ID=LOCUS_013306-RA;Parent=LOCUS_013306;db_xref=GO:0000062,InterPro:IPR000582,InterPro:IPR014352,PFAM:PF00887;product=Golgi resident protein GCP60
Marker51285	scaffold864	ID=LOCUS_013305-RA;Parent=LOCUS_013305;db_xref=GO:0006810|GO:0016021,InterPro:IPR009038,PFAM:PF13897;product=Golgi resident protein GCP60
Marker56657	scaffold1253	ID=LOCUS_016855-RA;Parent=LOCUS_016855;db_xref=GO:0016021,InterPro:IPR006634,PFAM:PF03798;product=TLC domain-containing protein 2
Marker56657	scaffold1253	ID=LOCUS_016859-RA;Parent=LOCUS_016859;db_xref=InterPro:IPR001828,InterPro:IPR028082,PFAM:PF01094;product=Glutamate [NMDA] receptor subunit 1
Marker56657	scaffold1253	ID=LOCUS_016860-RA;Parent=LOCUS_016860;product=Glutamate [NMDA] receptor subunit 1
Marker56657	scaffold1253	ID=LOCUS_016865-RA;Parent=LOCUS_016865;db_xref=GO:0005515,InterPro:IPR017986,InterPro:IPR029333,InterPro:IPR029429,InterPro:IPR029430,PFAM:PF14781,PFAM:PF14782,PFAM:PF14783;product=Bardet-Biedl syndrome 2
Marker5836	scaffold287	ID=LOCUS_006262-RA;Parent=LOCUS_006262;db_xref=GO:0005737|GO:0006886,InterPro:IPR006925,PFAM:PF04840;product=Spermatogenesis-defective protein 39
Marker5836	scaffold287	ID=LOCUS_006261-RA;Parent=LOCUS_006261;db_xref=GO:0000287,GO:0005975|GO:0016868,InterPro:IPR005844,InterPro:IPR016055,InterPro:IPR016066,PFAM:PF02878;product=Phosphoacetylglucosamine mutase
Marker5836	scaffold287	ID=LOCUS_006259-RA;Parent=LOCUS_006259;db_xref=GO:0005975|GO:0016868,GO:0016868|GO:0071704,InterPro:IPR005843,InterPro:IPR005846,InterPro:IPR016055,PFAM:PF00408,PFAM:PF02880;product=Phosphoacetylglucosamine mutase
Marker5836	scaffold287	ID=LOCUS_006258-RA;Parent=LOCUS_006258;db_xref=GO:0017119,InterPro:IPR007255,InterPro:IPR016159,InterPro:IPR016632,PFAM:PF04124;product=Conserved oligomeric Golgi complex subunit 8
Marker5836	scaffold287	ID=LOCUS_006255-RA;Parent=LOCUS_006255;db_xref=GO:0008152|GO:0016758,InterPro:IPR002213,PFAM:PF00201;product=glucosyl/glucuronosyl transferases
Marker58552	scaffold2028	ID=LOCUS_022400-RA;Parent=LOCUS_022400;db_xref=GO:0005515,InterPro:IPR001680,InterPro:IPR015943,InterPro:IPR017986;product=Cleavage stimulation factor subunit 1
Marker58552	scaffold2028	ID=LOCUS_022394-RA;Parent=LOCUS_022394;db_xref=InterPro:IPR006628,PFAM:PF04845;product=Transcriptional activator protein Pur-alpha
Marker58552	scaffold2028	ID=LOCUS_022398-RA;Parent=LOCUS_022398;db_xref=GO:0003676,GO:0005515,GO:0046872,InterPro:IPR000210,InterPro:IPR007087,InterPro:IPR011333,InterPro:IPR013087,InterPro:IPR015880,PFAM:PF00096,PFAM:PF00651,PFAM:PF13912;product=Protein bric-a-brac 1
Marker62543	scaffold3405	ID=LOCUS_029454-RA;Parent=LOCUS_029454;db_xref=GO:0005515,InterPro:IPR001024,InterPro:IPR013122,PFAM:PF01477,PFAM:PF08016;product=Polycystic kidney disease protein 1-like 2
Marker65316/Marker65558	scaffold1186	ID=LOCUS_016324-RA;Parent=LOCUS_016324;db_xref=GO:0016020,InterPro:IPR002229,InterPro:IPR029020;product=Ammonium transporter Rh type B-B
Marker65316/Marker65558	scaffold1186	ID=LOCUS_016322-RA;Parent=LOCUS_016322;db_xref=GO:0005524|GO:0006298|GO:0030983,InterPro:IPR000432,InterPro:IPR007695,InterPro:IPR007696,InterPro:IPR007860,InterPro:IPR007861,InterPro:IPR027417,PFAM:PF00488,PFAM:PF01624,PFAM:PF05188,PFAM:PF05190;product=DNA mismatch repair protein Msh2
Marker81377	scaffold2859	ID=LOCUS_026915-RA;Parent=LOCUS_026915;db_xref=GO:0004222|GO:0006508,GO:0008237,InterPro:IPR001590,InterPro:IPR024079,PFAM:PF01421;product=A disintegrin and metalloproteinase with thrombospondin motifs 18
