# Supplementary material for: Quantitative Trait Loci Mapping and Marker Identification for Low Salinity Tolerance Trait in the Swimming Crab (Portunus trituberculatus)
Source: Front Genet. 2019 Nov 20;10:1193. doi: 10.3389/fgene.2019.01193 (PMC6900548; doi:10.3389/fgene.2019.01193)
Supplement: Supplementary file 7 [file Table_7.xlsx]

## Sheet: 盐度标记注释
Table S7 Annotation information of scaffold1186
scaffold1186	mRNA	1129	1416	.	-	.	ID=LOCUS_016318-RA;Parent=LOCUS_016318
scaffold1186	mRNA	3241	4203	.	-	.	ID=LOCUS_016320-RA;Parent=LOCUS_016320
scaffold1186	mRNA	1983	2528	.	-	.	ID=LOCUS_016319-RA;Parent=LOCUS_016319
scaffold1186	mRNA	42374	42682	.	-	.	ID=LOCUS_016326-RA;Parent=LOCUS_016326
scaffold1186	mRNA	4819	5404	.	-	.	ID=LOCUS_016321-RA;Parent=LOCUS_016321
scaffold1186	mRNA	27999	29209	.	+	.	ID=LOCUS_016324-RA;Parent=LOCUS_016324;db_xref=GO:0016020,InterPro:IPR002229,InterPro:IPR029020;product=Ammonium transporter Rh type B-B
scaffold1186	mRNA	24252	27032	.	-	.	ID=LOCUS_016323-RA;Parent=LOCUS_016323
scaffold1186	mRNA	13966	25681	.	+	.	ID=LOCUS_016322-RA;Parent=LOCUS_016322;db_xref=GO:0005524|GO:0006298|GO:0030983,InterPro:IPR000432,InterPro:IPR007695,InterPro:IPR007696,InterPro:IPR007860,InterPro:IPR007861,InterPro:IPR027417,PFAM:PF00488,PFAM:PF01624,PFAM:PF05188,PFAM:PF05190;product=DNA mismatch repair protein Msh2
scaffold1186	mRNA	38027	42935	.	+	.	ID=LOCUS_016325-RA;Parent=LOCUS_016325
